# Supplementary material
Source: Springer Nature journal article supplement (https://www.springermedizin.de/resource/supplementary/12874_2009_435_MOESM4_ESM.pdf/9432092)

Hazard of rural hospital death

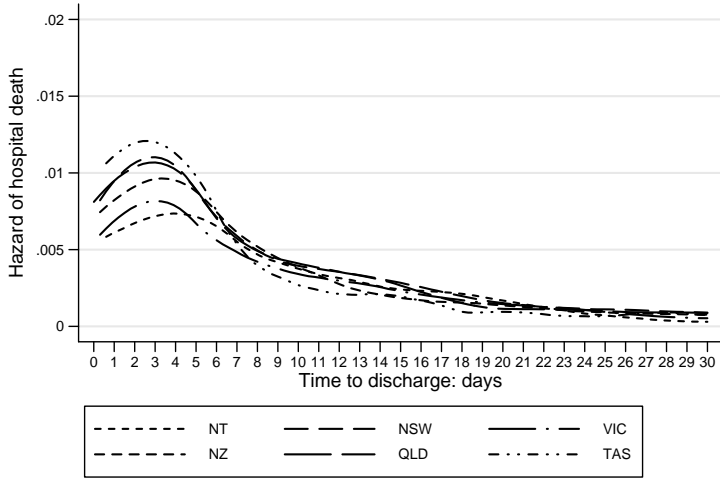

Hazard of metropolitan hospital death

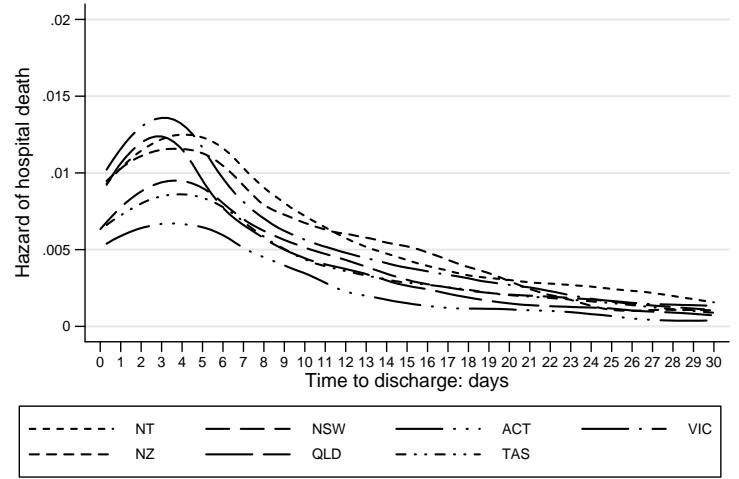

Hazard of tertiary hospital death

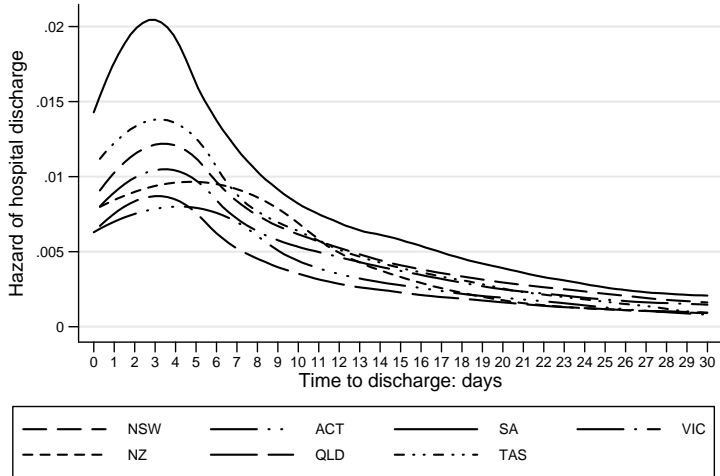

Hazard of private hospital death

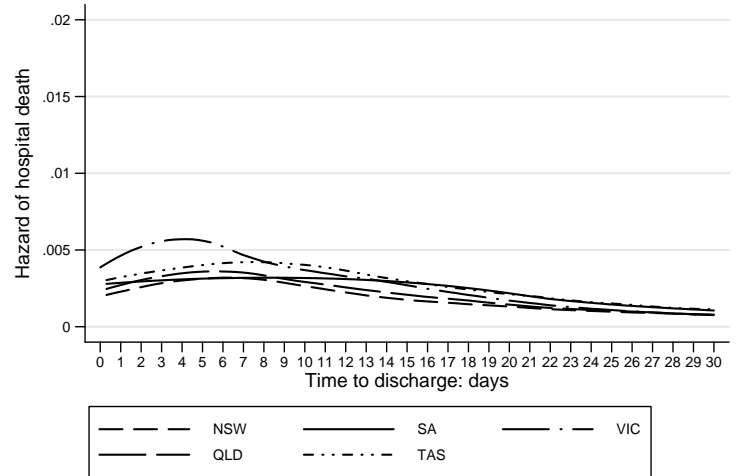

Supplement: MOESM4 [file 9432092]
